# Supplementary material for: Characterization of a New Reconstructed Full Thickness Skin Model, T-Skin™, and its Application for Investigations of Anti-Aging Compounds
Source: PubMed Central journal article supplement (PMC6540298; doi:10.3390/ijms20092240), 2019-05-07
Supplement: ijms-20-02240-s001.pdf [file ijms-20-02240-s001.pdf]

**Supplementary Table 1: Viability of T-Skin™ models with and without treatment of (A) 200 µM vitamin C and (B) 10 µM retinol.** Values are expressed as mean ± SD of the % untreated model metabolism of MTT in intact models and separated epidermis and dermis layers.

(A) Vitamin A

|                    | Whole skin  | Epidermis   | Dermis       |
|--------------------|-------------|-------------|--------------|
| Untreated          | 100.0 ± 0.0 | 100.0 ± 0.0 | 100.0 ± 0.0  |
| Vitamin C (200 µM) | 99.0 ± 18.0 | 99.6 ± 17.2 | 117.8 ± 14.9 |

(B) Retinol

|               | Skin        | Epidermis   | Dermis      |
|---------------|-------------|-------------|-------------|
| DMSO 0,1%     | 100.0 ± 3.9 | 100.0 ± 4.7 | 100.0 ± 1.1 |
| Retinol 10 µM | 107.9 ± 7.1 | 111.4 ± 7.2 | 95.1 ± 9.5  |
